# Supplementary material for: Enhanced photostability of an anthracene-based dye due to supramolecular encapsulation: a new type of photostable fluorophore for single-molecule study
Source: Royal Society of Chemistry journal article supplement (doi:10.1039/c4pp00065j), 2014-04-23
Supplement: c4pp00065j1.pdf [file c4pp00065j1.pdf]

**Electronic Supplementary Information (ESI) for:**

**Enhanced photostability of an anthracene-based dye due to supramolecular encapsulation: A new type of photostable fluorophore for single-molecule study**

Masaaki Mitsui,\* Koji Higashi, Ryoya Takahashi, Yohei Hirumi, Kenji Kobayashi

Department of Chemistry, Faculty of Science, Shizuoka University, 836 Ohya, Suruga-ku,  
Shizuoka 422-8529, Japan.

**AUTHOR INFORMATION**

**Corresponding Author**

E-mail: [smmitsu@ipc.shizuoka.ac.jp](mailto:smmitsu@ipc.shizuoka.ac.jp)

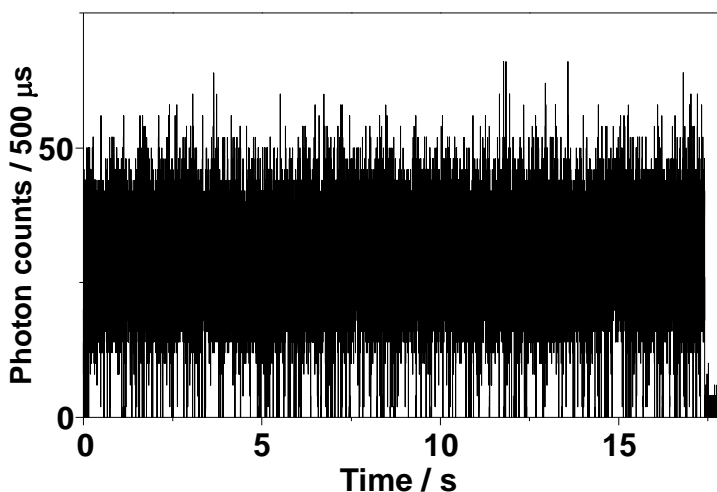

**Fig. S1** Typical fluorescence intensity trace for a single G molecule.

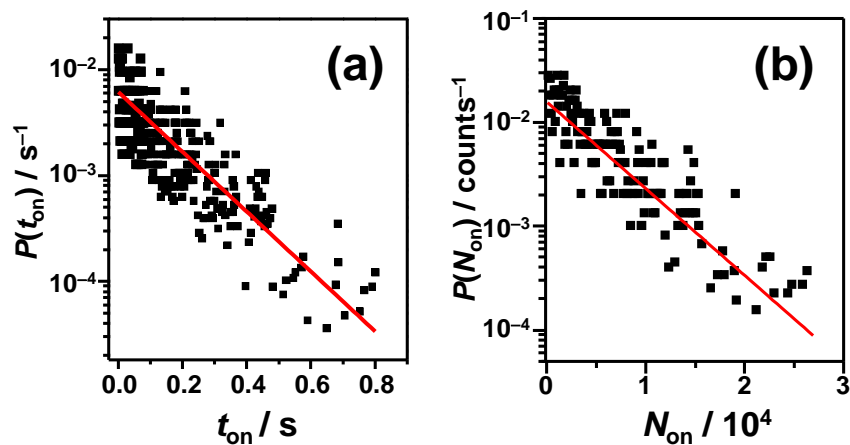

**Fig. S2** Probability density distributions of (a) on-time duration and (b) on-counts obtained from data in Fig. 2a. Straight lines are single exponential fits.

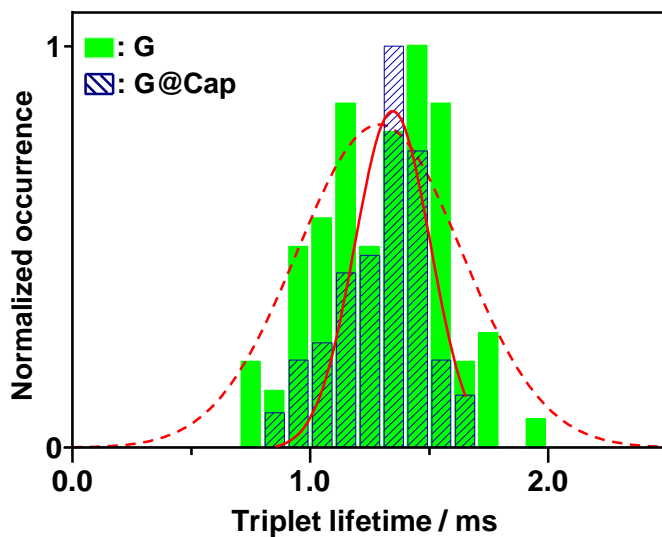

**Fig. S3** Histograms of triplet lifetimes obtained from the autocorrelation analysis of 84 G and 90 G@Cap molecules. Dotted and solid lines are Gaussian fits of each distribution. Average values and widths thus obtained are 1.29 and 0.69 ms for G, and 1.33 and 0.32 ms for G@Cap, respectively.

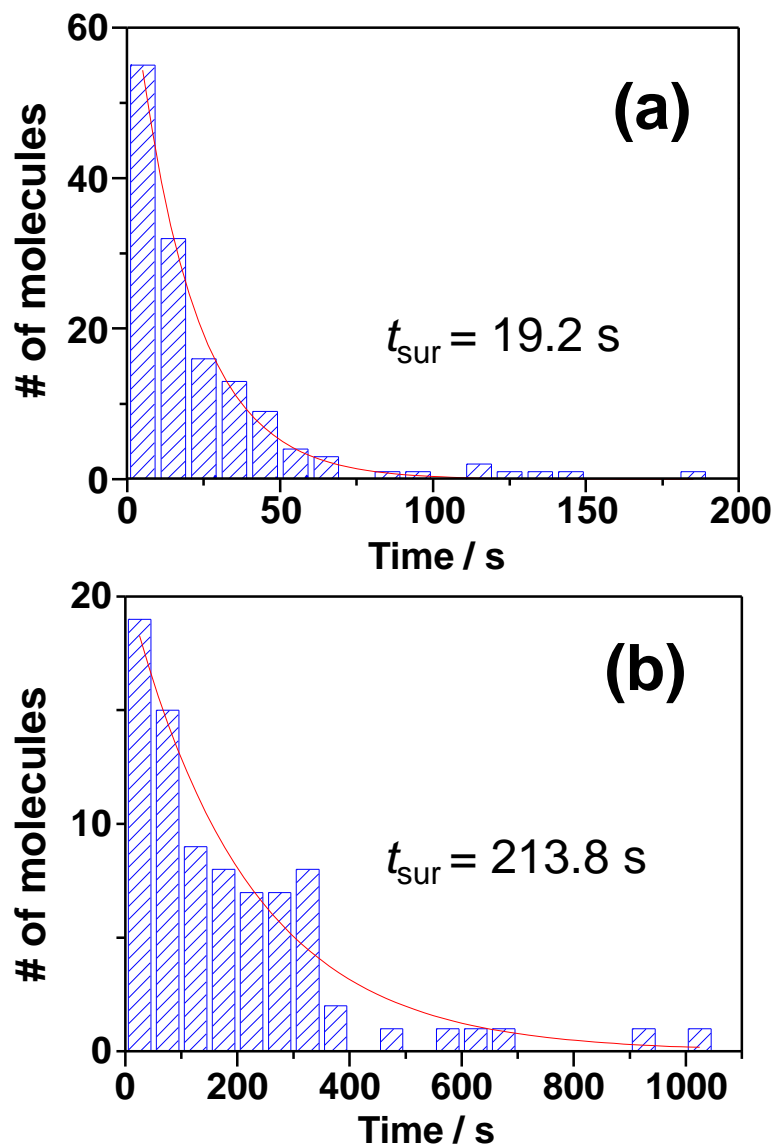

**Fig. S4** Histograms of survival times of G (140 molecules) and G@Cap (81 molecules) obtained with an average excitation intensity of approximately  $100 \text{ W/cm}^2$ . Average survival times  $\langle t_{\text{sur}} \rangle$  obtained by single exponential fits are 19.2 s for G and 213.8 s for G@Cap.

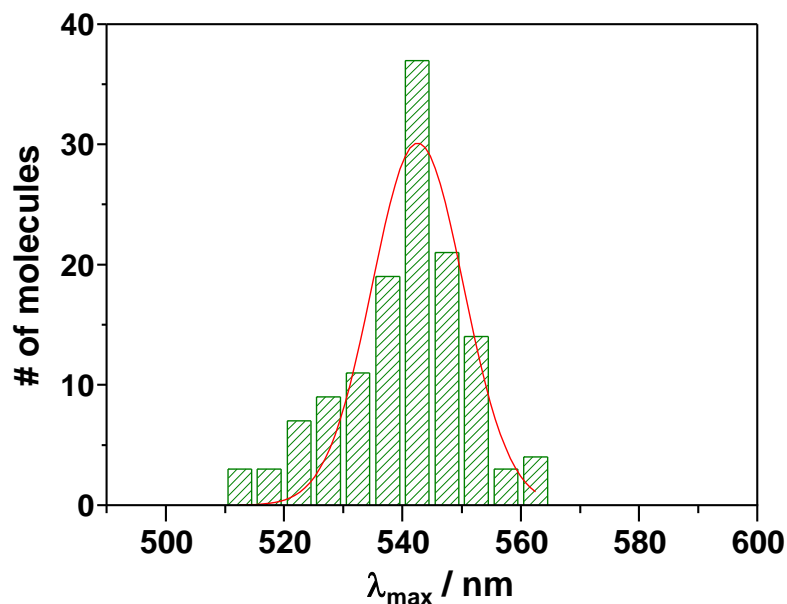

**Fig. S5** Histogram of  $\lambda_{\text{max}}$  of R6G (131 molecules) in a Zeonex film.

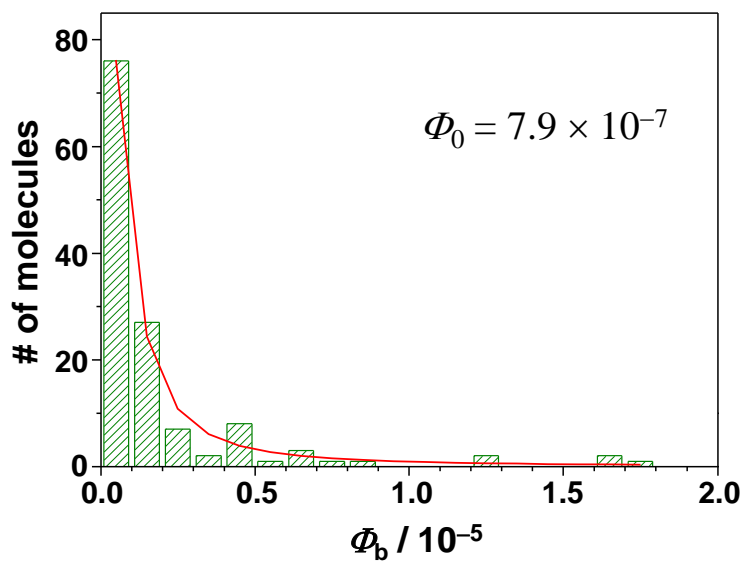

**Fig. S6** Histogram of photobleaching quantum yields of R6G (131 molecules) embedded in Zeonex. Because  $\sim 50\%$  of single R6G molecules measured during the experiment were photobleached immediately after laser irradiation, their photobleaching yields could not be evaluated. Thus,  $\Phi_0$  of  $7.9 \times 10^{-7}$  most likely corresponds to a lower limit value.
